# Supplementary material for: Combining selective inhibitors of nuclear export (SINEs) with chimeric antigen receptor (CAR) T cells for CD19-positive malignancies
Source: PubMed Central journal article supplement — Oncol Rep. 2021 Jun 23;46(2):170. doi: 10.3892/or.2021.8121 (PMC8250584; doi:10.3892/or.2021.8121), 2021-06-23

Figure S1. Difference of chromium 51 ( $^{51}\text{Cr}$ ) release of tumor cells Nalm-6 (orange), Reh (red), Daudi (brown) and Raji (blue) cells. As previously described (43,44), cytotoxicity was calculated as the percentage of specific lysis according to the following formula:  $\% \text{ specific lysis} = (\text{release in the test well} - \text{spontaneous } ^{51}\text{Cr release}) / \Delta\text{release} \times 100$ . Nalm-6 had the lowest  $\Delta\text{release}$  ( $\Delta\text{release} = \text{maximum release} - \text{spontaneous release}$ ) compared to other tumor cell lines, making chromium release assay to assess the cytotoxicity of CAR T cells on Nalm-6 cells inefficient. Therefore, functionality of CAR T cells towards Nalm-6 cells was assessed via flow cytometric analysis. CPM: Counts per minute. Experiments were performed in triplicate. Results are represented as mean  $\pm$  standard deviation (SD).

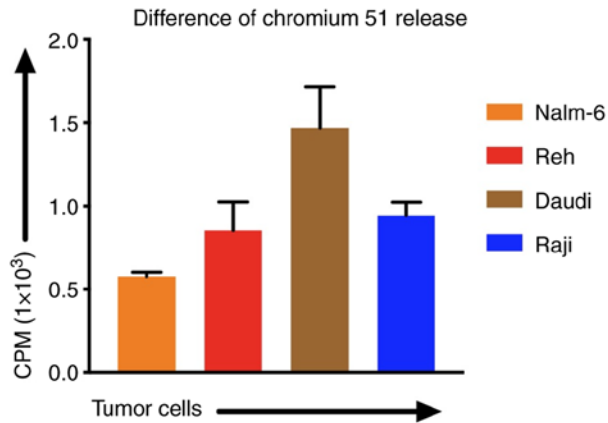

Figure S2. Expression of exhaustion markers LAG-3, PD-1 and Tim-3 on CAR T cells after simultaneous cultivation for 5 days of Daudi cells, CAR T cells and eltanexor (0.1  $\mu$ M: Orange, 0.5  $\mu$ M: red) compared to the DMSO control (brown). Experiments were performed in triplicate. Results are represented as mean  $\pm$  standard deviation (SD).

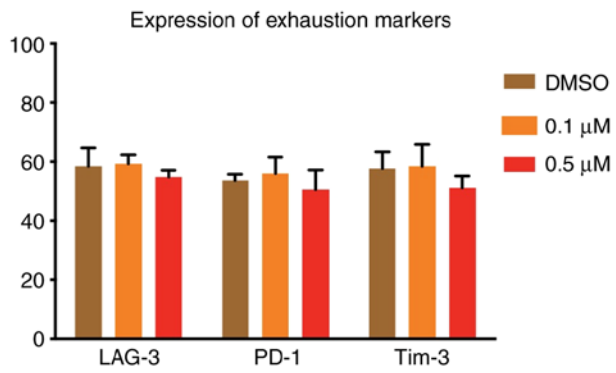

Figure S3. Representative flow cytometry dotplots (one healthy donor, HD) corresponding to Fig. 2A (displaying the cytotoxic effect of CAR T cells towards Nalm-6 cells, E:T: 1:2). Data of CAR T cells (CD3<sup>+</sup>CD10<sup>-</sup>) and Nalm-6 cells (CD3<sup>-</sup>CD10<sup>+</sup>) cultivated with DMSO (left, control), eltanexor 0.1  $\mu$ M (medial) and eltanexor 0.5  $\mu$ M (right) are represented. E, effector cells; T, target cells.

Representative flow cytometry dotplots for figure 2A  
Nalm-6: E:T 1:2

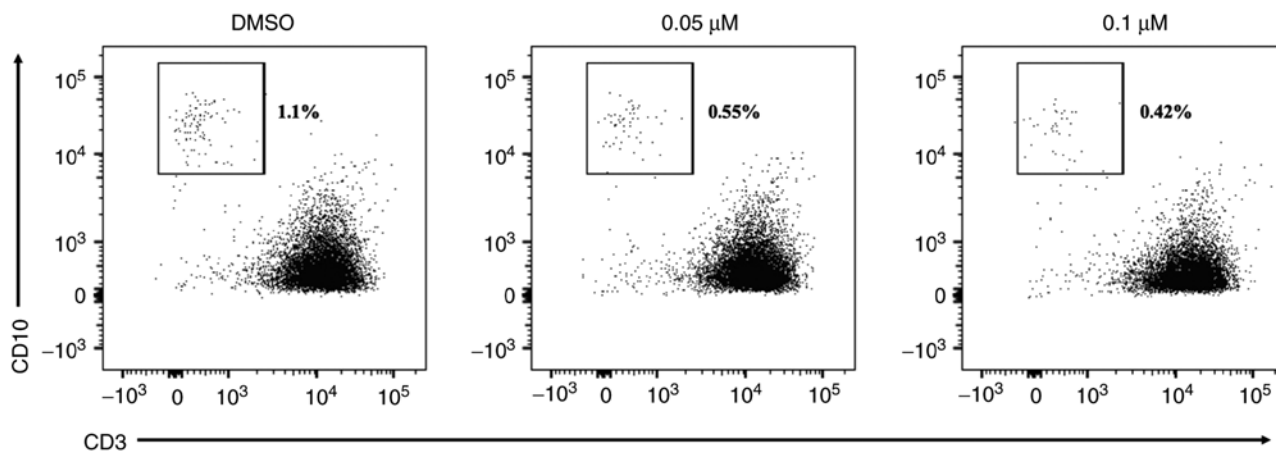

Figure S4. Representative flow cytometry data (one healthy donor, HD) corresponding to Fig. 4A (displaying the effects on cytokine release of co-culturing of eltanexor, CAR T cells and Daudi cells). Cytokine release defined as CD8<sup>+</sup>TNF- $\alpha$ <sup>+</sup> of CAR T cells cultivated with DMSO (left, control), eltanexor 0.1  $\mu$ M (medial) and eltanexor 0.5  $\mu$ M (right) is represented.

Representative flow cytometry dotplots for figure 4A

CD8<sup>+</sup>: TNF- $\alpha$ <sup>+</sup>

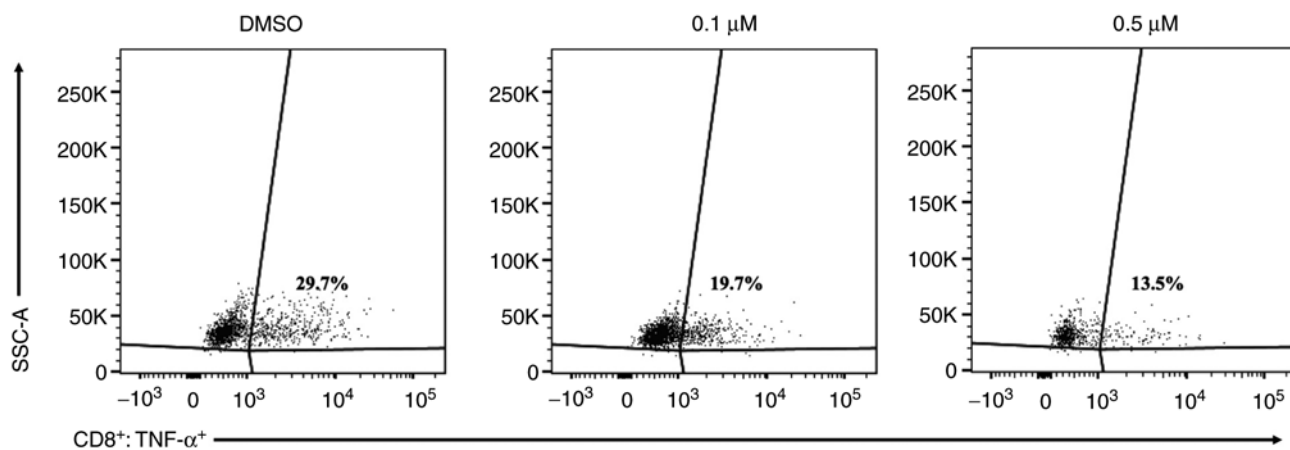

Figure S5. Representative flow cytometry data corresponding to Fig. 4B (level of phosphorylated-STAT3 of CAR T cells). Phosphorylated-STAT3<sup>+</sup> of CAR T cells cultivated with DMSO (left, control), eltanexor 0.1  $\mu$ M (medial) and eltanexor 0.5  $\mu$ M (right) is represented.

Representative flow cytometry dotplots for figure 4B  
SINE concentration ( $\mu$ M)

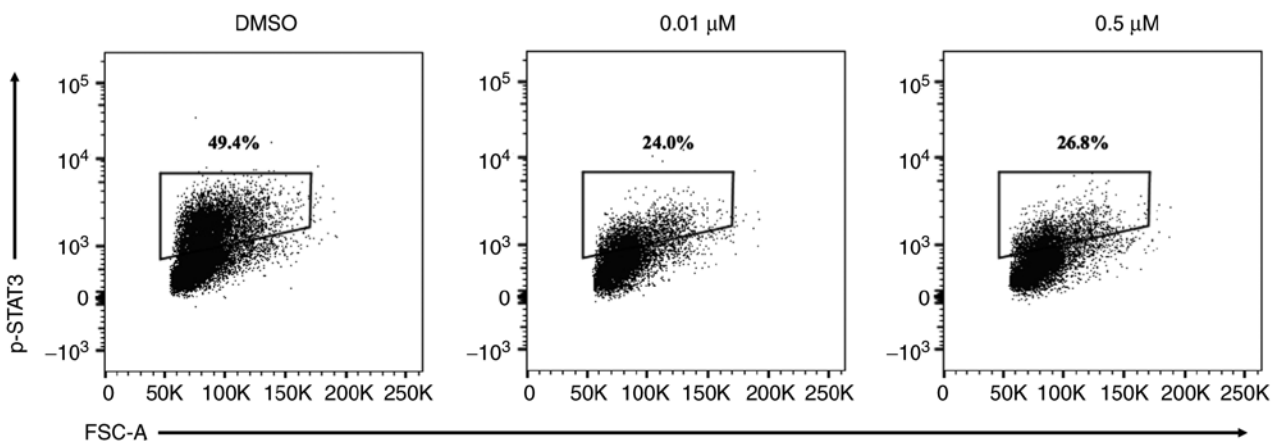

Figure S6. Representative flow cytometry data (one healthy donor, HD) corresponding to Fig. 5A (displaying cytotoxicity of CAR T cells on Nalm-6 cells, E: T: 1:2). Data of CAR T cells ( $CD3^+CD10^-$ ) and Nalm-6 cells ( $CD3^-CD10^+$ ) cultivated with DMSO (left, control), eltanexor  $0.1 \mu\text{M}$  (medial) and eltanexor  $0.5 \mu\text{M}$  (right) are represented. E, effector cells; T, target cells.

Representative flow cytometry dotplots for figure 5A

Nalm-6: E:T 1:2

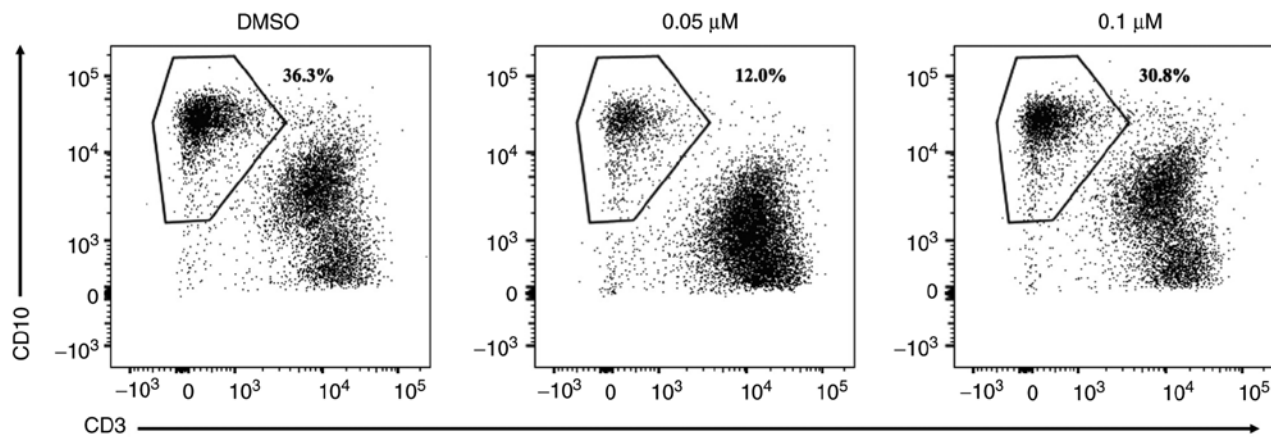

Figure S7. Representative flow cytometry data (one healthy donor, HD) corresponding to Fig. 6A (displaying the effects on cytokine release of coculturing of eltanexor, CAR T cells and Daudi cells). Cytokine release defined as CD8<sup>+</sup>TNF- $\alpha$ <sup>+</sup> of CAR T cells cultivated with DMSO (left, control), eltanexor 0.1  $\mu$ M (medial) and eltanexor 0.5  $\mu$ M (right) is represented.

Representative flow cytometry dotplots for figure 6A  
CD8<sup>+</sup>: TNF- $\alpha$ <sup>+</sup>

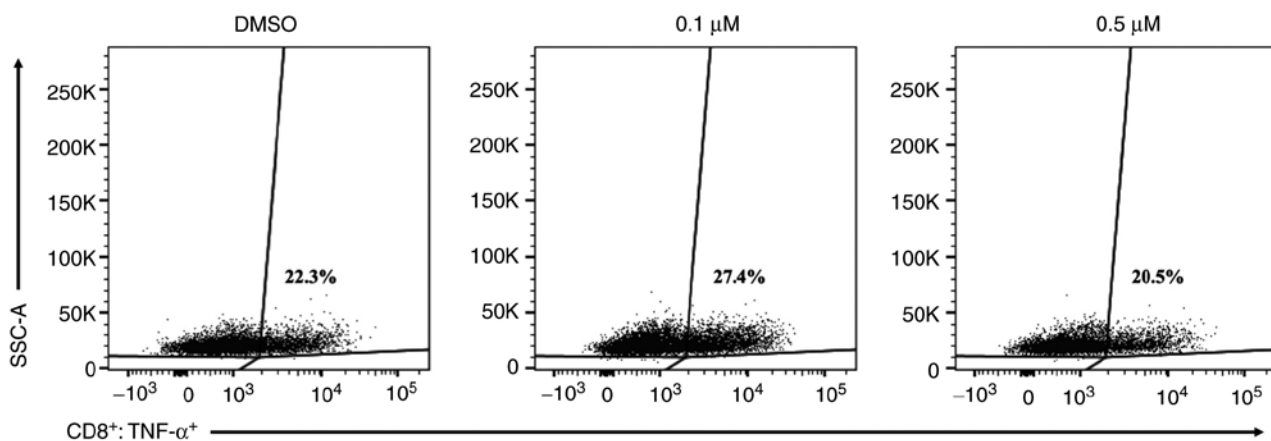

Figure S8. Representative flow cytometry data (one healthy donor, HD) corresponding to Fig. 7 (displaying expression of exhaustion markers on CAR T cells after simultaneous cultivation for 5 days of Nalm-6 cells, CAR T cells and eltanexor). PD-1<sup>+</sup> CAR T cells cultivated with DMSO (left, control), eltanexor 0.1  $\mu$ M (medial) and eltanexor 0.5  $\mu$ M (right) are represented.

Representative flow cytometry dotplots for figure 7  
Nalm-6: PD-1

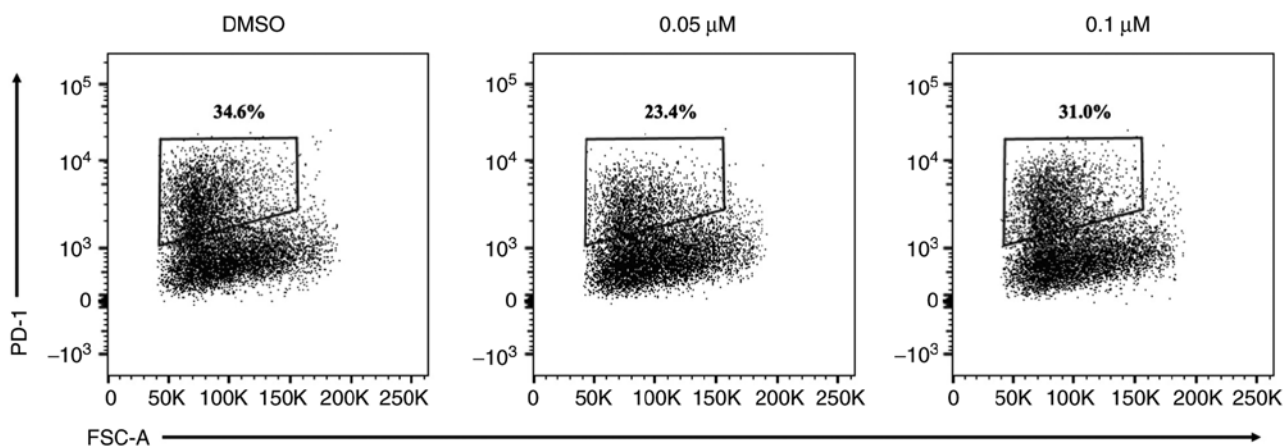



Figure S9. Representative flow cytometry data (one healthy donor, HD) corresponding to Fig. S2 (displaying expression of exhaustion markers on CAR T cells after simultaneous cultivation of Daudi cells, CAR T cells and eltanexor for 5 days). PD-1<sup>+</sup> CAR T cells cultivated with DMSO (left, control), eltanexor 0.1  $\mu$ M (medial) and eltanexor 0.5  $\mu$ M (right) are represented.

Representative flow cytometry dotplots for supplementary figure 2

Daudi: Tim-3

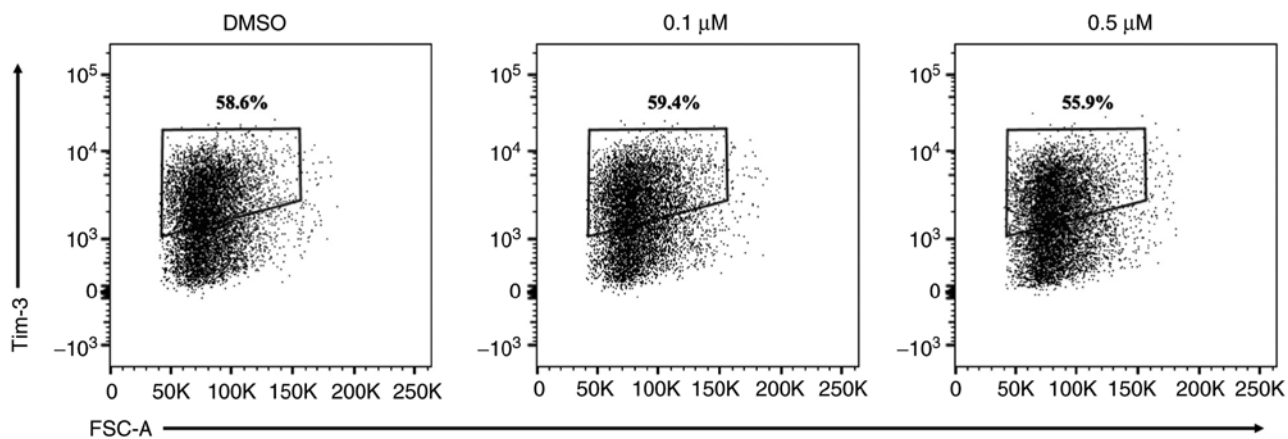

Figure S10. Representation of the gating strategy to assess cytotoxicity of CAR T cells towards Nalm-6 cells. Absolute counting beads were used to quantify vital cells. Live cells were defined as Near-IR<sup>+</sup>. Single cells were selected by SSC-A and SSC-H. CAR T cells (CD3<sup>+</sup>CD10<sup>-</sup>) and Nalm-6 cells (CD3<sup>-</sup>CD10<sup>+</sup>) were distinguished using CD3 and CD10 antibodies.

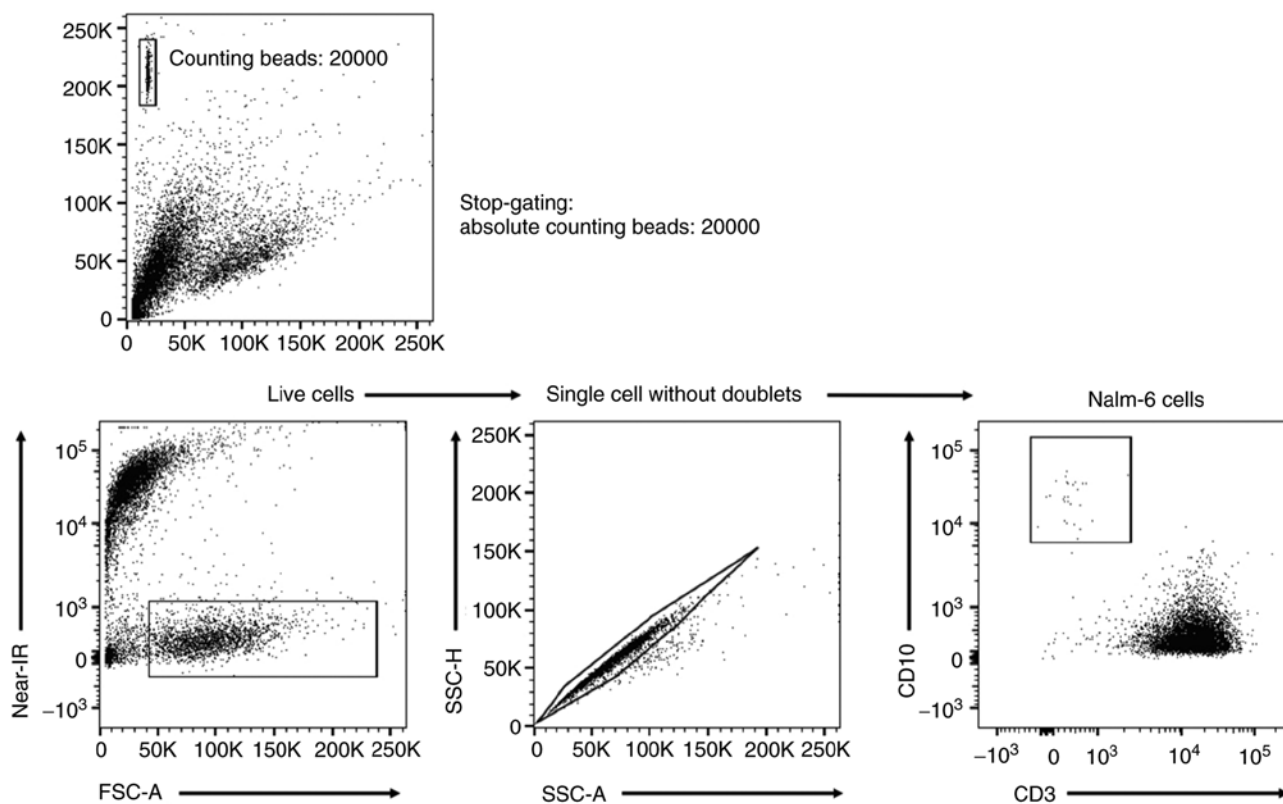

Figure S11. Representative flow cytometry data to distinguish CAR T cells from non-transduced T cells. CAR T cells (CD19 CAR PE, i.e., anti-human goat F(ab) IgG (H+L) PE)<sup>+</sup> were defined as CAR T cells. The anti-IgG antibody is directed against the extracellular single chain variable fragment (scFv) of the CAR. As neither natural T cells nor untransduced T cells express the CAR on their surface, flow cytometry results prove successful transduction of cells.

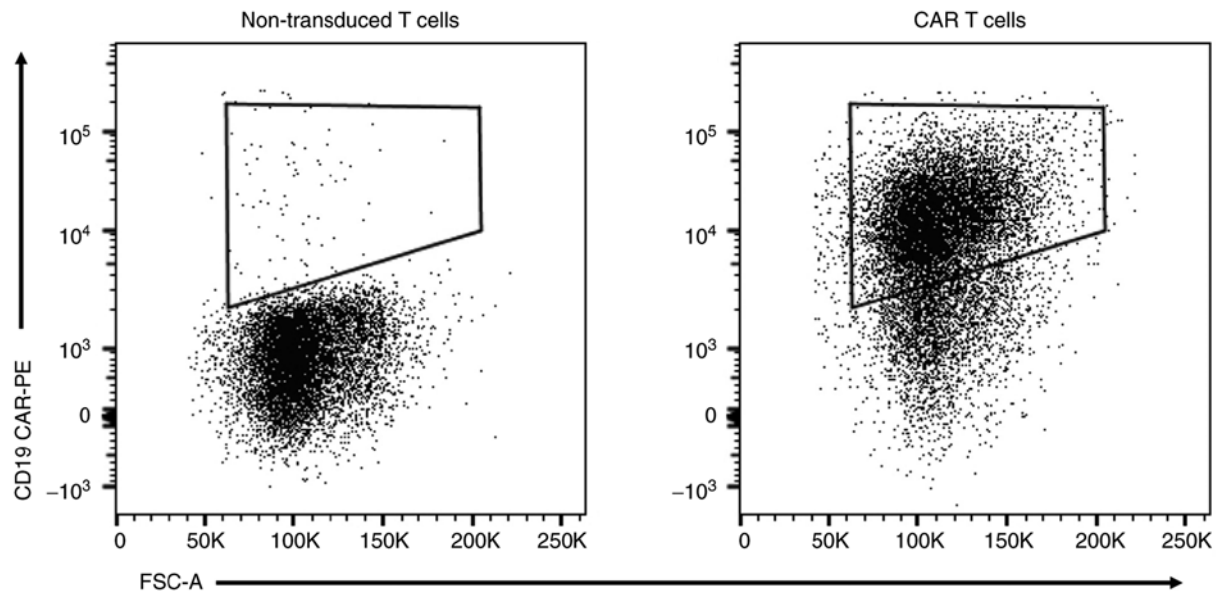

Figure S12. Gating strategy showing the approach to distinguish CAR T cells from non-transduced T cells (Fig. 11), after gating for CD3<sup>+</sup> T cells. Anti-IgG staining distinguished CAR T cells from non-transduced T cells.

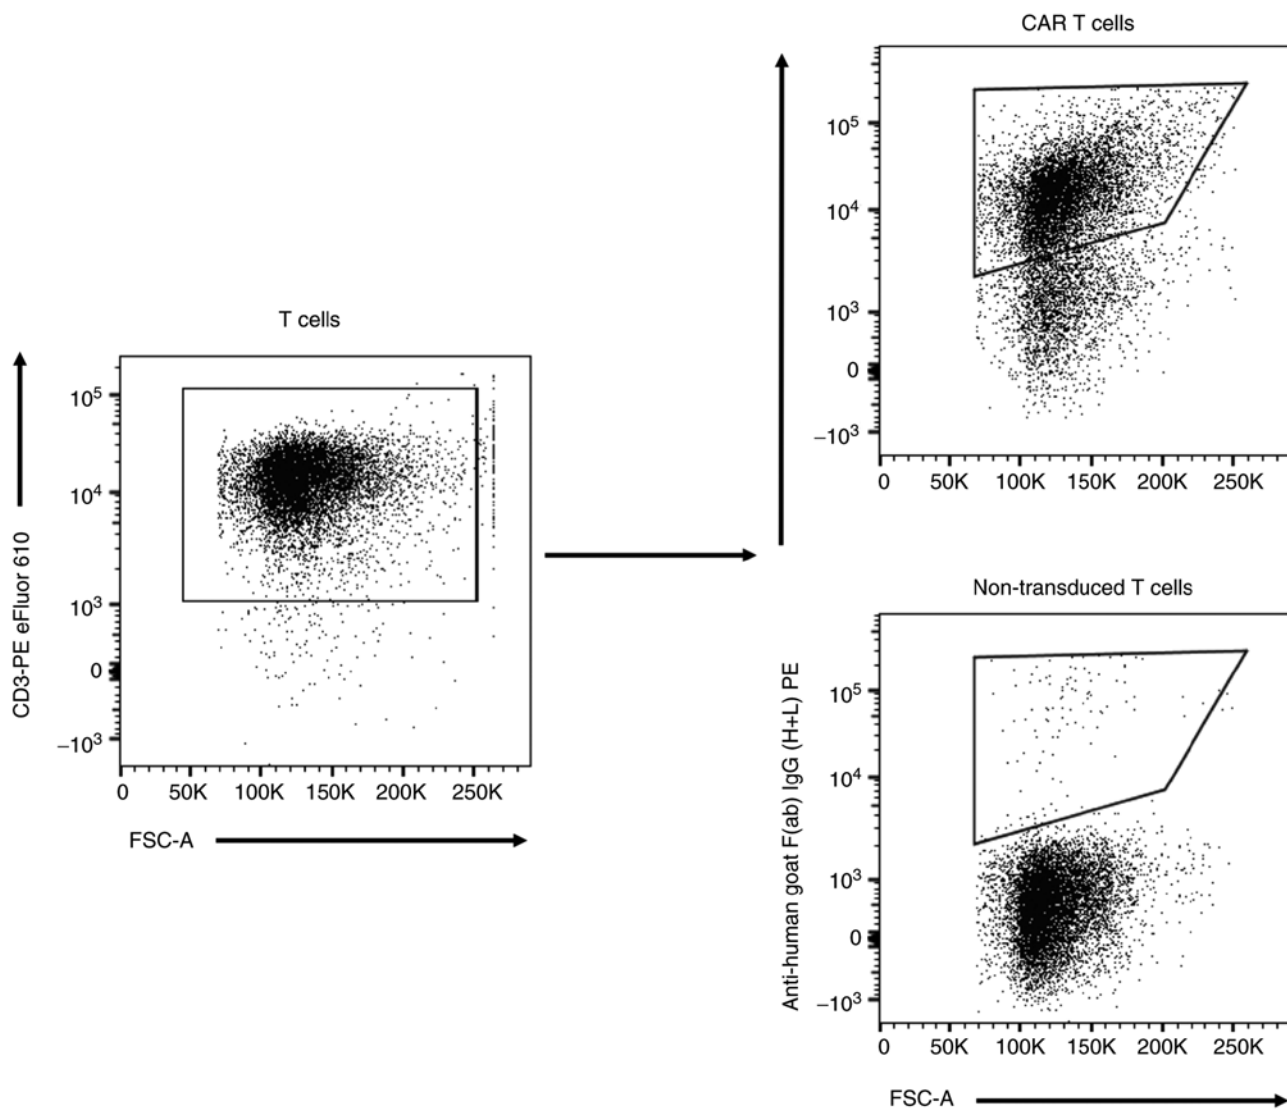

Supplement: Supplementary_Data.pdf [file Supplementary_Data.pdf]
